# Supplementary material for: Detection of spreader nodes in human-SARS-CoV protein-protein interaction network
Source: PeerJ journal article supplement (doi:10.7717/peerj.12117), 2021-09-06
Supplement: Supplementary_Document.pdf [file Supplementary_Document.pdf]

# Detection of spreader nodes in Human-SARS-CoV protein-protein interaction network: Supplementary Document

## 1. Algorithm of Synthetic PPIN formation

---

### Algorithm 1: Synthetic PPIN Formation

---

**Input:** PPIN represented by an undirected graph where each vertex represents a protein and edge represents the interactions.

No. of nodes (k)

**Output:** Synthetic PPIN with given no. of nodes (k)

---

Begin

*//formation of a list of unique nodes*

M =  $\emptyset$  //Let M be an empty list

k = 0

*// i  $\neq$  j and  $1 \leq i, j \leq n$ , n is the total no. of proteins in PPIN*

*for each combination of protein pair ( $P_i, P_j$ ) in PPIN*

*split the protein pair ( $P_i, P_j$ )*

*append each protein  $P_i$  and  $P_j$  to M*

*k = k + 1*

*end for*

*//Formation of unique set of proteins by applying set ()*

*set M=list(set(M))*

*// Random selection of nodes by importing random module and storing in random\_nodes*

*set random\_nodes to random.sample(nodes,k)*

*//Display selected random nodes*

*output (random\_nodes)*

*//Display of interactions of selected random nodes i.e., synthetic PPIN*

*for each protein  $P_i$  in random\_nodes*

*for each combination of protein pair ( $P_i, P_j$ ) in PPIN*

*if protein  $P_i$  present in protein pair ( $P_i, P_j$ )*

*output (protein pair ( $P_i, P_j$ ))*

*end if*

*end for*

*end for*

End

---

## 2. Studied Models in epidemiology

Compartmental models are a very general modelling technique. They are often applied to the mathematical modelling of infectious diseases. The **SIR model** is one of the simplest compartmental models, and many models are derivatives of this basic form. The model consists of three compartments: -

**S:** The number of susceptible individuals. When a susceptible and an infectious individual come into "infectious contact", the susceptible individual contracts the disease and transitions to the infectious compartment.

**I:** The number of infectious individuals. These are individuals who have been infected and are capable of infecting susceptible individuals.

**R:** The number of removed (and immune) or deceased individuals. These individuals have been infected and have either completely recovered from the disease and entered the removed compartment (completely immune to the disease), or died. It is assumed that the number of deaths is negligible concerning the total population. This compartment may also be called "recovered" or "resistant". They will not be again infected with the same disease.

Some infections, for example, those from the common cold and influenza, do not confer any long-lasting immunity. Such infections do not give immunity upon recovery from infection, and individuals become susceptible again. So, for these kinds of infections *SIS model* is used. The model consists of three compartments: -

**S:** The number of susceptible individuals. When a susceptible and an infectious individual come into "infectious contact", the susceptible individual contracts the disease and transitions to the infectious compartment.

**I:** The number of infectious individuals. These are individuals who have been infected and are capable of infecting susceptible individuals.

**S:** Individuals get recovered and again become susceptible.

Out of SIR (susceptible, infected, and recovered) and SIS model (susceptible, infected, and susceptible), SIS is the standard one because from the viral infection perspective, there is nothing called a completely recovered state (**R**) because if someone gets infected with viral disease then they will avail drugs for the disease and will get cured. But they again become susceptible to the same disease (**S**). Therefore, it cannot be guaranteed that the viral disease will not happen again after getting cured. So, the SIS model is given more priority than SIR in this proposed work.

### 3. Supplementary Tables

Table S1 Ranked spreader edges between SARS-CoV s level 1 and level 2 human spreaders at high threshold

| Rank | Spreader Edges                                 |        | Spreading ability of spreader edges |
|------|------------------------------------------------|--------|-------------------------------------|
|      | SARS-CoV s level 1 and level 2 human spreaders |        |                                     |
| 1    | APP                                            | UBE2I  | 9297903                             |
| 2    | APP                                            | CAV1   | 8882769                             |
| 3    | APP                                            | PPIA   | 8743925                             |
| 4    | APP                                            | EIF3F  | 8737730                             |
| 5    | BCL2A1                                         | APP    | 8640455                             |
| 6    | ELAVL1                                         | EEF1A1 | 4284371                             |

|    |        |        |         |
|----|--------|--------|---------|
| 7  | NCL    | ELAVL1 | 4174604 |
| 8  | PPIA   | ELAVL1 | 4168684 |
| 9  | BCL2L2 | ELAVL1 | 4065937 |
| 10 | NXF1   | UBE2I  | 3653905 |
| 11 | NXF1   | SGTA   | 3402603 |
| 12 | NTRK1  | YWHAE  | 3275095 |
| 13 | NXF1   | CAV1   | 3238771 |
| 14 | NXF1   | EEF1A1 | 3215615 |
| 15 | XPO1   | UBE2I  | 3169805 |
| 16 | DCTN2  | NXF1   | 3066498 |
| 17 | NTRK1  | CAV1   | 3038977 |
| 18 | NXF1   | MCL1   | 3038159 |
| 19 | NTRK1  | EEF1A1 | 3015820 |
| 20 | XPO1   | YWHAE  | 2990790 |
| 21 | NCL    | NTRK1  | 2906052 |
| 22 | NTRK1  | PPIA   | 2900133 |
| 23 | NTRK1  | EIF3F  | 2893938 |
| 24 | DCTN2  | NTRK1  | 2866704 |
| 25 | GRB2   | UBE2I  | 2349446 |
| 26 | GRB2   | YWHAE  | 2170431 |
| 27 | IKBKB  | MEOX2  | 2061694 |
| 28 | UBC    | SGTA   | 2048943 |
| 29 | YWHAE  | EGFR   | 2023580 |
| 30 | GRB2   | PFDN5  | 1943610 |
| 31 | GRB2   | EEF1A1 | 1911156 |

Table S2 Ranked spreader edges between SARS-CoV s level 1 and level 2 human proteins at medium threshold

| Spreader Edges |                                                |        |                                     |
|----------------|------------------------------------------------|--------|-------------------------------------|
| Rank           | SARS-CoV s level 1 and level 2 human spreaders |        | Spreading ability of spreader edges |
| 1              | APP                                            | UBE2I  | 9297902.664                         |
| 2              | APP                                            | CAV1   | 8882768.796                         |
| 3              | APP                                            | PPIA   | 8743924.63                          |
| 4              | APP                                            | EIF3F  | 8737729.873                         |
| 5              | BCL2A1                                         | APP    | 8640455.016                         |
| 6              | ELAVL1                                         | EEF1A1 | 4284371.281                         |
| 7              | NCL                                            | ELAVL1 | 4174603.596                         |
| 8              | PPIA                                           | ELAVL1 | 4168683.646                         |
| 9              | BCL2L2                                         | ELAVL1 | 4065936.721                         |
| 10             | NXF1                                           | UBE2I  | 3653905.316                         |
| 11             | NXF1                                           | SGTA   | 3402602.703                         |
| 12             | NTRK1                                          | YWHAE  | 3275094.903                         |

|    |          |        |             |
|----|----------|--------|-------------|
| 13 | NXF1     | CAV1   | 3238771.448 |
| 14 | NXF1     | EEF1A1 | 3215614.916 |
| 15 | XPO1     | UBE2I  | 3169805.311 |
| 16 | DCTN2    | NXF1   | 3066498.385 |
| 17 | NTRK1    | CAV1   | 3038976.693 |
| 18 | NXF1     | MCL1   | 3038159.191 |
| 19 | NTRK1    | EEF1A1 | 3015820.161 |
| 20 | XPO1     | YWHAE  | 2990789.654 |
| 21 | NCL      | NTRK1  | 2906052.476 |
| 22 | NTRK1    | PPIA   | 2900132.526 |
| 23 | NTRK1    | EIF3F  | 2893937.769 |
| 24 | DCTN2    | NTRK1  | 2866703.629 |
| 25 | GRB2     | UBE2I  | 2349446.25  |
| 26 | GRB2     | YWHAE  | 2170430.592 |
| 27 | IKBKB    | MEOX2  | 2061694.24  |
| 28 | UBC      | SGTA   | 2048942.842 |
| 29 | YWHAE    | EGFR   | 2023579.783 |
| 30 | GRB2     | PFDN5  | 1943609.51  |
| 31 | GRB2     | EEF1A1 | 1911155.85  |
| 32 | UBC      | EEF1A1 | 1861955.055 |
| 33 | TP53     | UBE2I  | 1829375.898 |
| 34 | BAG3     | UBE2I  | 1809920.855 |
| 35 | NCL      | GRB2   | 1801388.165 |
| 36 | GRB2     | PPIA   | 1795468.215 |
| 37 | CAV1     | EGFR   | 1787461.572 |
| 38 | GOLGA2   | UBE2I  | 1779690.372 |
| 39 | EEF1A1   | EGFR   | 1764305.041 |
| 40 | DCTN2    | GRB2   | 1762039.318 |
| 41 | NCL      | UBC    | 1752187.37  |
| 42 | EIF3F    | UBC    | 1740072.663 |
| 43 | YWHAE    | SHMT2  | 1738748.567 |
| 44 | DCTN2    | UBC    | 1712838.523 |
| 45 | BCL2A1   | GRB2   | 1691998.601 |
| 46 | MCL1     | UBC    | 1684499.329 |
| 47 | TP53     | YWHAE  | 1650360.24  |
| 48 | EIF3F    | EGFR   | 1642422.649 |
| 49 | PROP1    | UBE2I  | 1641256.177 |
| 50 | BAG3     | YWHAE  | 1630905.197 |
| 51 | CDK2     | UBE2I  | 1622979.319 |
| 52 | DCTN2    | EGFR   | 1615188.509 |
| 53 | CUL3     | YWHAE  | 1614438.165 |
| 54 | TRIM27   | UBE2I  | 1579133.993 |
| 55 | CEACAM1  | EGFR   | 1537728.445 |
| 56 | HSP90AA1 | YWHAE  | 1503676.376 |

|    |          |       |             |
|----|----------|-------|-------------|
| 57 | TRAF6    | UBE2I | 1451472.666 |
| 58 | CDK2     | YWHAE | 1443963.661 |
| 59 | MCM2     | YWHAE | 1440253.354 |
| 60 | BRCA1    | UBE2I | 1439839.399 |
| 61 | HSP90AA1 | SGTA  | 1431389.421 |
| 62 | ESR1     | UBE2I | 1424801.897 |

Table S3 Ranked spreader edges between SARS-CoV s level 1 and level 2 human spreaders at low threshold

| Spreader Edges |                                                |        |                                     |
|----------------|------------------------------------------------|--------|-------------------------------------|
| Rank           | SARS-CoV s level 1 and level 2 human spreaders |        | Spreading ability of spreader edges |
| 1              | APP                                            | UBE2I  | 9297902.664                         |
| 2              | APP                                            | CAV1   | 8882768.796                         |
| 3              | APP                                            | PPIA   | 8743924.63                          |
| 4              | APP                                            | EIF3F  | 8737729.873                         |
| 5              | BCL2A1                                         | APP    | 8640455.016                         |
| 6              | ELAVL1                                         | EEF1A1 | 4284371.281                         |
| 7              | NCL                                            | ELAVL1 | 4174603.596                         |
| 8              | PPIA                                           | ELAVL1 | 4168683.646                         |
| 9              | BCL2L2                                         | ELAVL1 | 4065936.721                         |
| 10             | NXF1                                           | UBE2I  | 3653905.316                         |
| 11             | NXF1                                           | SGTA   | 3402602.703                         |
| 12             | NTRK1                                          | YWHAE  | 3275094.903                         |
| 13             | NXF1                                           | CAV1   | 3238771.448                         |
| 14             | NXF1                                           | EEF1A1 | 3215614.916                         |
| 15             | XPO1                                           | UBE2I  | 3169805.311                         |
| 16             | DCTN2                                          | NXF1   | 3066498.385                         |
| 17             | NTRK1                                          | CAV1   | 3038976.693                         |
| 18             | NXF1                                           | MCL1   | 3038159.191                         |
| 19             | NTRK1                                          | EEF1A1 | 3015820.161                         |
| 20             | XPO1                                           | YWHAE  | 2990789.654                         |
| 21             | NCL                                            | NTRK1  | 2906052.476                         |
| 22             | NTRK1                                          | PPIA   | 2900132.526                         |
| 23             | NTRK1                                          | EIF3F  | 2893937.769                         |
| 24             | DCTN2                                          | NTRK1  | 2866703.629                         |
| 25             | GRB2                                           | UBE2I  | 2349446.25                          |
| 26             | GRB2                                           | YWHAE  | 2170430.592                         |
| 27             | IKBKB                                          | MEOX2  | 2061694.24                          |
| 28             | UBC                                            | SGTA   | 2048942.842                         |
| 29             | YWHAE                                          | EGFR   | 2023579.783                         |
| 30             | GRB2                                           | PFDN5  | 1943609.51                          |
| 31             | GRB2                                           | EEF1A1 | 1911155.85                          |

|    |          |        |             |
|----|----------|--------|-------------|
| 32 | UBC      | EEF1A1 | 1861955.055 |
| 33 | TP53     | UBE2I  | 1829375.898 |
| 34 | BAG3     | UBE2I  | 1809920.855 |
| 35 | NCL      | GRB2   | 1801388.165 |
| 36 | GRB2     | PPIA   | 1795468.215 |
| 37 | CAV1     | EGFR   | 1787461.572 |
| 38 | GOLGA2   | UBE2I  | 1779690.372 |
| 39 | EEF1A1   | EGFR   | 1764305.041 |
| 40 | DCTN2    | GRB2   | 1762039.318 |
| 41 | NCL      | UBC    | 1752187.37  |
| 42 | EIF3F    | UBC    | 1740072.663 |
| 43 | YWHAE    | SHMT2  | 1738748.567 |
| 44 | DCTN2    | UBC    | 1712838.523 |
| 45 | BCL2A1   | GRB2   | 1691998.601 |
| 46 | MCL1     | UBC    | 1684499.329 |
| 47 | TP53     | YWHAE  | 1650360.24  |
| 48 | EIF3F    | EGFR   | 1642422.649 |
| 49 | PROP1    | UBE2I  | 1641256.177 |
| 50 | BAG3     | YWHAE  | 1630905.197 |
| 51 | CDK2     | UBE2I  | 1622979.319 |
| 52 | DCTN2    | EGFR   | 1615188.509 |
| 53 | CUL3     | YWHAE  | 1614438.165 |
| 54 | TRIM27   | UBE2I  | 1579133.993 |
| 55 | CEACAM1  | EGFR   | 1537728.445 |
| 56 | HSP90AA1 | YWHAE  | 1503676.376 |
| 57 | TRAF6    | UBE2I  | 1451472.666 |
| 58 | CDK2     | YWHAE  | 1443963.661 |
| 59 | MCM2     | YWHAE  | 1440253.354 |
| 60 | BRCA1    | UBE2I  | 1439839.399 |
| 61 | HSP90AA1 | SGTA   | 1431389.421 |
| 62 | ESR1     | UBE2I  | 1424801.897 |
| 63 | COPS5    | UBE2I  | 1402029.245 |
| 64 | TP53     | EEF1A1 | 1391085.498 |
| 65 | CAV1     | MOV10  | 1381399.319 |
| 66 | ZDHHC17  | EEF1A1 | 1380592.242 |
| 67 | UBE2I    | ATXN1  | 1362088.512 |
| 68 | MOV10    | EEF1A1 | 1358242.787 |
| 69 | TMEM17   | CAV1   | 1356149.641 |
| 70 | CUL3     | EEF1A1 | 1355163.423 |
| 71 | HSPB1    | UBE2I  | 1341884.753 |
| 72 | MYC      | YWHAE  | 1341253.761 |
| 73 | LNX1     | PFDN5  | 1333010.914 |
| 74 | DCTN2    | SHMT2  | 1330357.294 |
| 75 | TP53     | IKBKB  | 1314401.976 |

|     |          |        |             |
|-----|----------|--------|-------------|
| 76  | YWHAE    | FBXO6  | 1313852.619 |
| 77  | HGS      | UBE2I  | 1294714.22  |
| 78  | TP53     | NCL    | 1281317.814 |
| 79  | CUL3     | IKBKB  | 1278479.9   |
| 80  | YWHAE    | VCP    | 1277472.997 |
| 81  | TRAF2    | YWHAE  | 1274995.25  |
| 82  | TP53     | BCL2   | 1268975.057 |
| 83  | HSP90AA1 | CAV1   | 1267558.165 |
| 84  | BAG3     | NCL    | 1261862.77  |
| 85  | MDM2     | UBE2I  | 1260258.833 |
| 86  | YWHAZ    | YWHAE  | 1255600.341 |
| 87  | BAG3     | BCL2   | 1249520.013 |
| 88  | NCL      | MOV10  | 1248475.102 |
| 89  | CUL3     | NCL    | 1245395.738 |
| 90  | HSP90AA1 | EEF1A1 | 1244401.634 |
| 91  | CUL3     | PPIA   | 1239475.788 |
| 92  | TP53     | BCL2L1 | 1239080.263 |
| 93  | EWSR1    | PPIA   | 1229282.205 |
| 94  | FN1      | YWHAE  | 1214083.458 |
| 95  | TP53     | MCL1   | 1213629.773 |
| 96  | EP300    | UBE2I  | 1213483.256 |
| 97  | CUL3     | DCTN2  | 1206046.891 |
| 98  | CDK1     | UBE2I  | 1205680.466 |
| 99  | UBE2I    | AGTRAP | 1198756.302 |
| 100 | HDAC1    | UBE2I  | 1194236.516 |
| 101 | BAG3     | MCL1   | 1194174.73  |
| 102 | IKBKE    | UBE2I  | 1186760.92  |
| 103 | LNX1     | PPIA   | 1184869.618 |
| 104 | CDK2     | EEF1A1 | 1184688.919 |
| 105 | YWHAE    | ATXN1  | 1183072.854 |
| 106 | MCM2     | EEF1A1 | 1180978.612 |
| 107 | PFDN5    | SDCBP  | 1178978.137 |
| 108 | TCF4     | UBE2I  | 1174611.299 |
| 109 | TP53     | BCL2L2 | 1172650.939 |
| 110 | HSP90AA1 | IKBKB  | 1167718.111 |
| 111 | CSNK2B   | UBE2I  | 1166588.488 |
| 112 | HSPB1    | YWHAE  | 1162869.095 |
| 113 | JUN      | UBE2I  | 1162163.465 |
| 114 | KDM1A    | UBE2I  | 1155214.334 |
| 115 | CDC37    | UBE2I  | 1151160.054 |
| 116 | TRIM23   | UBE2I  | 1145591.625 |
| 117 | HSP90AA1 | NCL    | 1134633.949 |
| 118 | HSP90AA1 | BCL2   | 1122291.192 |
| 119 | BMI1     | UBE2I  | 1120564.971 |

|     |         |        |             |
|-----|---------|--------|-------------|
| 120 | CCDC8   | YWHAE  | 1118799.628 |
| 121 | CSNK2A1 | CAV1   | 1117578.493 |
| 122 | MYC     | PFDN5  | 1114432.68  |
| 123 | HSF2BP  | UBE2I  | 1113581.235 |
| 124 | FBXW11  | YWHAE  | 1086642.037 |
| 125 | SRC     | YWHAE  | 1085833.441 |
| 126 | NCL     | CDK2   | 1074921.234 |
| 127 | NCL     | MCM2   | 1071210.927 |
| 128 | PPIA    | CDK2   | 1069001.284 |
| 129 | CALM1   | YWHAE  | 1067438.977 |
| 130 | MCM2    | PPIA   | 1065290.977 |
| 131 | IKBKB   | TRIM27 | 1064160.071 |
| 132 | BCL2    | CDK2   | 1062578.478 |
| 133 | MCM2    | EIF3F  | 1059096.22  |
| 134 | TERF2   | UBE2I  | 1055418.427 |
| 135 | FBXO6   | EEF1A1 | 1054577.877 |
| 136 | UNC119  | UBE2I  | 1052917.816 |
| 137 | CAV1    | VCP    | 1041354.787 |
| 138 | BAG6    | SGTA   | 1039029.262 |
| 139 | TRAF2   | CAV1   | 1038877.04  |
| 140 | YWHAB   | YWHAE  | 1038503.438 |
| 141 | TRAF6   | CAV1   | 1036338.798 |
| 142 | CFTR    | UBE2I  | 1035883.116 |
| 143 | YWHAQ   | YWHAE  | 1034131.766 |
| 144 | AURKA   | UBE2I  | 1032671.376 |
| 145 | CLTC    | UBE2I  | 1030687.678 |
| 146 | KAT5    | UBE2I  | 1015856.627 |
| 147 | UBE2I   | TSNAX  | 1010628.678 |
| 148 | CUL7    | YWHAE  | 1010074.36  |
| 149 | ESR1    | CAV1   | 1009668.029 |
| 150 | WNK1    | UBE2I  | 1009409.677 |
| 151 | MCL1    | CDK2   | 1007233.194 |
| 152 | CREBBP  | UBE2I  | 1001371.822 |
| 153 | HDAC5   | UBE2I  | 999897.9437 |
| 154 | FOS     | UBE2I  | 998888.38   |
| 155 | UBE2I   | SIAH1  | 998794.2497 |
| 156 | WDYHV1  | PFDN5  | 998338.5732 |
| 157 | YWHAZ   | EEF1A1 | 996325.5986 |
| 158 | UBE2I   | TSG101 | 994223.1527 |
| 159 | HNRNPA1 | UBE2I  | 994154.0026 |
| 160 | UBE2I   | LMNA   | 993727.7467 |
| 161 | BTRC    | YWHAE  | 993713.5665 |
| 162 | SH3KBP1 | UBE2I  | 992752.976  |
| 163 | TRIP13  | UBE2I  | 992337.1069 |



|     |         |         |             |
|-----|---------|---------|-------------|
| 164 | NCL     | CSNK2A1 | 984654.2768 |
| 165 | YWHAG   | YWHAE   | 983125.5399 |
| 166 | CUL1    | YWHAE   | 983107.805  |
| 167 | UBE2I   | SUMO2   | 982210.8384 |
| 168 | PTEN    | UBE2I   | 981258.9481 |
| 169 | TRIM28  | UBE2I   | 979151.0849 |
| 170 | SLX4    | UBE2I   | 976097.5171 |
| 171 | APC     | YWHAE   | 975907.5724 |
| 172 | UNK     | YWHAE   | 973611.9526 |
| 173 | CSNK2A1 | EIF3F   | 972539.5696 |
| 174 | MYC     | NCL     | 972211.3346 |
| 175 | CDC37   | YWHAE   | 972144.3969 |
| 176 | MYH9    | UBE2I   | 970752.1564 |
| 177 | HLA-B   | SGTA    | 968992.1249 |
| 178 | CAV1    | PRKACA  | 968598.7454 |
| 179 | AR      | UBE2I   | 967692.3425 |
| 180 | ATF2    | UBE2I   | 966712.2472 |
| 181 | YWHAB   | SGTA    | 966216.483  |
| 182 | SUMO1   | UBE2I   | 965376.1591 |
| 183 | COPS5   | EEF1A1  | 963738.8454 |
| 184 | AKT1    | YWHAE   | 963671.5308 |
| 185 | ABL1    | YWHAE   | 962733.2864 |
| 186 | MYC     | BCL2    | 959868.5778 |
| 187 | UBE2I   | SMAD4   | 959192.5665 |
| 188 | OBSL1   | YWHAE   | 957100.0055 |
| 189 | FN1     | EEF1A1  | 954808.7158 |
| 190 | FHL3    | UBE2I   | 954696.496  |
| 191 | DAXX    | UBE2I   | 953684.4234 |
| 192 | HDAC4   | UBE2I   | 950274.9524 |
| 193 | FUS     | UBE2I   | 949535.1125 |
| 194 | SUZ12   | UBE2I   | 948330.2296 |
| 195 | TRIP6   | SGTA    | 946975.115  |
| 196 | PRKDC   | UBE2I   | 946021.6212 |
| 197 | UBE2I   | UBE2D2  | 945725.2466 |
| 198 | STAT1   | UBE2I   | 944739.8548 |
| 199 | UBE2I   | TRIM54  | 944513.0565 |
| 200 | SIRT1   | UBE2I   | 943590.5083 |
| 201 | HSPA8   | YWHAE   | 943349.4099 |
| 202 | PRKAA2  | UBE2I   | 939213.0138 |
| 203 | TRAF2   | IKBKB   | 939036.9856 |
